# Supplementary material for: A Strategy for International Cooperation in the COVID-19 Pandemic Era: Focusing on National Scientific Funding Data
Source: MDPI journal article supplement (doi:10.3390/healthcare8030204), 2020-07-09
Supplement: s1 [file s1]

**Supplementary Materials:** Coronavirus-related R&D areas of the United States, the European Union, Japan, and South Korea.

**Table S1.** Research related to mechanisms of infection, the life cycle of SARS-CoV-2, and identification of virus-host interaction mechanism (Sub-cluster 1-1).

| NO | Organization                             | Title                                                                        | Estimated Average Cost/Fiscal Year (USD) | Estimated Total Cost (USD) | Start date        | End date         | Geographic Region |
|----|------------------------------------------|------------------------------------------------------------------------------|------------------------------------------|----------------------------|-------------------|------------------|-------------------|
| 1  | University of Maryland Baltimore         | Host-pathogen and the microbiome: determinants of infectious disease outcome | 3,926,048                                | 19,630,240                 | 15 April 2014     | 31 March 2019    | US                |
| 2  | Children's Hospital Boston               | Structure and assembly of viruses                                            | 379,571                                  | 14,423,698                 | 1 June 1975       | 30 April 2013    | US                |
| 3  | University of Tennessee Knoxville        | Coronavirus RNA replication                                                  | 349,845                                  | 12,944,265                 | 1 July 1977       | 31 May 2014      | US                |
| 4  | University of North Carolina Chapel Hill | Characterization of novel genes encoded TY RNA and DNA viruses               | 2,117,960                                | 12,707,760                 | 21 June 2013      | 31 May 2019      | US                |
| 5  | University of Pennsylvania               | Molecular biology of coronavirus induced demyelination                       | 299,302                                  | 9,278,362                  | 1 July 1985       | 30 November 2015 | US                |
| 6  | Vanderbilt University                    | Polymerase proteins in coronavirus replication                               | 284,420                                  | 6,826,080                  | 30 September 1991 | 30 April 2015    | US                |
| 7  | Wadsworth Center                         | Genetic analysis of molecular interactions in coronavirus replication        | 517,899                                  | 5,696,889                  | 1 June 2005       | 31 March 2016    | US                |
| 8  | Vanderbilt University                    | The cell biology of coronavirus infection                                    | 343,312                                  | 4,463,056                  | 15 December 2002  | 30 November 2015 | US                |
| 9  | University of North Carolina Chapel Hill | Mechanisms of MERS-CoV entry cross species transmission and pathogenesis     | 738,577                                  | 3,692,885                  | 20 April 2015     | 31 March 2020    | US                |

|    |                                                            |                                                                                                                         |         |           |                   |                  |    |
|----|------------------------------------------------------------|-------------------------------------------------------------------------------------------------------------------------|---------|-----------|-------------------|------------------|----|
| 10 | University of North Carolina Chapel Hill                   | Molecular biology of viral diseases                                                                                     | 179,474 | 3,589,480 | 30 September 1993 | 31 August 2013   | US |
| 11 | Northwestern University at Chicago                         | Barrier integrity microbiome and HIV target cell interactions in the human male genital tract pre and post circumcision | 638,625 | 3,193,125 | 1 September 2017  | 31 July 2022     | US |
| 12 | Loyola University Chicago                                  | Mechanisms of viral proteases in coronavirus replication and pathogenesis                                               | 627,215 | 3,136,075 | 1 July 2010       | 30 June 2015     | US |
| 13 | Ecohealth Alliance Inc                                     | Understanding the risk of bat coronavirus emergence                                                                     | 617,347 | 3,086,735 | 1 June 2014       | 31 May 2019      | US |
| 14 | Oregon Health and Science University                       | Systems biology approaches to viral pathogenesis and immunity                                                           | 960,510 | 2,881,530 | 1 March 2011      | 28 February 2014 | US |
| 15 | Lovelace Biomedical & Environmental Research Institute Inc | SARS coronavirus virulence factors and lung pathogenesis                                                                | 471,906 | 2,831,436 | 3 April 2006      | 31 March 2012    | US |
| 16 | University of Maryland Baltimore                           | Targeting TLR signaling pathways to blunt pathogen mediated acute lung injury                                           | 547,143 | 2,735,715 | 10 February 2017  | 31 January 2022  | US |
| 17 | University of Pennsylvania                                 | Neurovirulence of murine coronavirus roles of viral genes                                                               | 389,837 | 2,728,859 | 3 April 2006      | 31 March 2013    | US |
| 18 | University of Iowa                                         | Role of eicosanoids in pathogenic human CoV infections                                                                  | 545,235 | 2,726,175 | 23 September 2016 | 31 August 2021   | US |
| 19 | University of California Irvine                            | Molecular biology of eukaryotic viruses                                                                                 | 100,277 | 2,607,202 | 30 September 1988 | 30 November 2013 | US |
| 20 | University of Pennsylvania                                 | MERS coronavirus antagonism of double stranded RNA induced host response by accessory proteins                          | 497,163 | 2,485,815 | 24 May 2018       | 30 April 2023    | US |
| 21 | University of North Carolina Chapel Hill                   | SARS-CoV pathogenic mechanisms in senescent mice                                                                        | 488,268 | 2,441,340 | 1 April 2008      | 31 March         | US |

|    |                                           |                                                                                      |           |           |                   |                   |    |
|----|-------------------------------------------|--------------------------------------------------------------------------------------|-----------|-----------|-------------------|-------------------|----|
|    |                                           |                                                                                      |           |           |                   | 2013              |    |
| 22 | Oregon Health and Science University      | Systems pathogenomics of severe acute respiratory virus infection                    | 758,603   | 2,275,809 | 1 March 2011      | 28 February 2014  | US |
| 23 | University of Utah                        | Strategies to prevent infection and reduce interindividual transmission spirit       | 733,333   | 2,200,000 | 30 September 2015 | 29 September 2018 | US |
| 24 | University of Iowa                        | Biology of ace2 activity in the airway epithelium                                    | 302,719   | 2,119,033 | 19 June 2011      | 15 August 2017    | US |
| 25 | Cornell University Ithaca                 | Structural and functional analysis of the coronavirus spike protein fusion peptide   | 506,453   | 2,025,812 | 9 August 2018     | 31 July 2022      | US |
| 26 | University of North Carolina Chapel Hill  | Role of uncharacterized genes in high pathogenic human coronavirus infection         | 396,549   | 1,982,745 | 1 June 2012       | 31 October 2016   | US |
| 27 | University of Maryland Baltimore          | Role of the epithelial growth factor receptor in SARS coronavirus pathogenesis       | 376,852   | 1,884,260 | 1 July 2011       | 30 June 2016      | US |
| 28 | U of L Imperial Col of Sci/Technology/Med | Models for synthesizing molecular clinical and epidemiological data and translate    | 370,861   | 1,854,305 | 15 September 2014 | 31 May 2019       | US |
| 29 | The University of Pittsburgh              | Targeting host responses to prevent virus induced ARDS in the nonhuman primate model | 1,809,375 | 1,809,375 | 15 September 2018 | 14 September 2021 | US |
| 30 | Indiana University Bloomington            | Novel RNA structures in coronavirus replication                                      | 356,180   | 1,780,900 | 1 January 2008    | 31 December 2012  | US |
| 31 | University of Texas Medical Br Galveston  | Analysis of SARSs coronavirus host cell interactions                                 | 291,833   | 1,750,998 | 5 August 2007     | 31 July 2013      | US |
| 32 | University of Texas Medical Br Galveston  | New paradigm for host and viral gene regulation by MERS coronavirus nsp1             | 346,482   | 1,732,410 | 1 May 2015        | 30 April 2020     | US |

|    |                                           |                                                                                   |         |           |                   |                   |    |
|----|-------------------------------------------|-----------------------------------------------------------------------------------|---------|-----------|-------------------|-------------------|----|
| 33 | University of Iowa                        | Entry and pathogenesis of two human coronaviruses                                 | 338,636 | 1,693,180 | 19 July 2011      | 30 June 2016      | US |
| 34 | Vanderbilt University                     | Determinants of coronavirus fidelity in replication and pathogenesis              | 481,881 | 1,445,643 | 1 August 2013     | 30 April 2016     | US |
| 35 | University of Texas Medical Br Galveston  | Analysis of coronavirus host cell interactions                                    | 329,960 | 1,319,840 | 15 March 2012     | 29 February 2016  | US |
| 36 | University of Washington                  | Structural studies of coronavirus fusion proteins                                 | 259,841 | 1,299,205 | 1 August 2016     | 31 July 2021      | US |
| 37 | Harvard University                        | Identification and characterization of cellular receptors for enveloped viruses   | 418,975 | 1,256,925 | 1 March 2011      | 28 February 2014  | US |
| 38 | University of Northern Colorado           | Experimental tacrine virus infection of Jamaican fruit bats                       | 402,668 | 1,208,004 | 19 July 2010      | 30 June 2013      | US |
| 39 | University of Pennsylvania                | Pathogenesis of murine coronavirus induced hepatitis                              | 400,000 | 1,200,000 | 30 September 2011 | 29 September 2014 | US |
| 40 | Loyola University Chicago                 | Entry and pathogenesis of coronaviruses                                           | 376,191 | 1,128,573 | 1 September 2011  | 31 August 2014    | US |
| 41 | University of Missouri-Columbia           | Restriction of viral membrane fusion and entry by infirm proteins                 | 392,973 | 785,946   | 4 August 2014     | 31 July 2016      | US |
| 42 | University of Pennsylvania                | Mechanism of murine coronavirus induced hepatitis                                 | 236,250 | 708,750   | 1 June 2009       | 31 May 2012       | US |
| 43 | Texas A & M University Health Science Ctr | A genetic analysis of pneumotropism and pneumovirulence in an mnhv1 model of SARS | 224,284 | 672,852   | 22 May 2009       | 30 April 2012     | US |
| 44 | Children's Hospital Boston                | Viral and host determinants of new world alpha viral entry                        | 133,515 | 667,575   | 1 June 2011       | 31 May 2016       | US |
| 45 | Drexel University                         | Role of microRNAs in coronavirus induced lethal encephalitis                      | 212,407 | 637,221   | 1 June 2011       | 31 May 2014       | US |
| 46 | Loyola University Chicago                 | Ubiquitin and cellular factors in coronavirus assembly                            | 186,875 | 560,625   | 5 June 2009       | 31 May 2012       | US |

|    |                                            |                                                                                                                |         |         |                   |                  |    |
|----|--------------------------------------------|----------------------------------------------------------------------------------------------------------------|---------|---------|-------------------|------------------|----|
| 47 | University of Pennsylvania                 | Control of coronavirus pathogenesis by antagonism of RNase I                                                   | 227,125 | 454,250 | 1 July 2015       | 30 June 2017     | US |
| 48 | Bucknell University                        | Transcriptomics of immunity and disease in African fruit bats important zoonotic reservoirs                    | 220,229 | 440,458 | 1 January 2017    | 31 December 2018 | US |
| 49 | University of Texas Medical Br Galveston   | Establishment of a transgenic mouse model for middle east respiratory syndrome co                              | 213,000 | 426,000 | 1 June 2014       | 31 May 2016      | US |
| 50 | Texas A & M University Health Science Ctr  | Conserved RNA secondary structures in three beta coronaviruses MHV CoV and MERS-CoV                            | 211,875 | 423,750 | 15 March 2016     | 28 February 2018 | US |
| 51 | University of Maryland College Park Campus | New paradigms for ribosome recoding in strand viruses                                                          | 204,978 | 409,956 | 1 February 2015   | 31 January 2017  | US |
| 52 | University of Wisconsin Madison            | Flow enhanced characterization of drug resistant viruses                                                       | 98,964  | 395,856 | 15 September 2008 | 30 June 2012     | US |
| 53 | University of North Carolina Chapel Hill   | Systems based analysis of host factors that contribute to aging pathogenesis                                   | 150,663 | 301,326 | 15 July 2015      | 31 May 2017      | US |
| 54 | Scripps Research Institute                 | Structural studies of the coronavirus life cycle                                                               | 103,478 | 206,956 | 14 July 2017      | 30 June 2019     | US |
| 55 | Drexel University                          | Role of toll like receptors 2 and 3 in coronavirus induced encephalitis                                        | 76,168  | 152,336 | 1 April 2010      | 31 March 2012    | US |
| 56 | University of North Carolina Chapel Hill   | Evaluation of SARS-CoV 2o methyltransferase mutants                                                            | 44,030  | 132,090 | 1 January 2013    | 31 December 2015 | US |
| 57 | Vanderbilt University                      | Roles of replication fidelity in viral RNA synthesis population diversity and overall fitness of coronaviruses | 28,952  | 115,808 | 13 January 2017   | 12 January 2021  | US |
| 58 | University of Pennsylvania                 | Investigating MERS-CoV ns4b as a modulator of the host antiviral response in the nucleus                       | 37,817  | 113,451 | 1 September 2017  | 31 August 2020   | US |
| 59 | University of Kentucky                     | Fusion protein TMTM interactions modulation of prefusion protein stability                                     | 34,703  | 69,406  | 15 May 2015       | 14 May 2017      | US |
| 60 | University of Iowa                         | Deciphering the role of the coronavirus macro domain in SARS-CoV infection                                     | 53,282  | 53,282  | 25 December       | 24 December      | US |

|    |                                                           |                                                                                                                  |         |         | 2014             | 2015             |       |
|----|-----------------------------------------------------------|------------------------------------------------------------------------------------------------------------------|---------|---------|------------------|------------------|-------|
| 61 | University of Pennsylvania                                | Coronavirus antagonism of the oasRNase I pathway                                                                 | 46,470  | 46,470  | 1 January 2015   | 31 October 2015  | US    |
| 62 | Cornell University Ithaca                                 | Mouse hepatitis coronavirus receptor binding domain                                                              | 10,975  | 10,975  | 1 April 2011     | 31 March 2012    | US    |
| 63 | Keystone Symposia                                         | Positive strand RNA viruses                                                                                      | 8,000   | 8,000   | 8 March 2013     | 28 February 2014 | US    |
| 64 | Loyola University Chicago                                 | Nido2017 international norovirus symposium                                                                       | 5,000   | 5,000   | 1 June 2017      | 31 May 2018      | US    |
| 65 | Keystone Symposia                                         | Pathogenesis of respiratory viruses                                                                              | 5,000   | 5,000   | 1 January 2014   | 31 December 2014 | US    |
| 66 | Cornell University Ithaca                                 | Internal fusion peptide of the severe acute respiratory syndrome coronavirus                                     | 2,896   | 2,896   | 1 September 2011 | 31 August 2012   | US    |
| 67 | Research Institute, International Medical Center of Japan | Mode of severe respiratory failure by SARS-CoV                                                                   | 184,600 | 553,800 | 1 January 2010   | 31 December 2012 | Japan |
| 68 | Yamaguchi University                                      | Elucidation of the mechanism mutation mechanism and virulence acquisition machine of coronavirus                 | 171,600 | 514,800 | 1 April 2015     | 31 March 2018    | Japan |
| 69 | Fujita Health University                                  | The clustering mechanism and the driving force of the macro membrane domains                                     | 54,600  | 163,800 | 1 April 2012     | 31 March 2015    | Japan |
| 70 | National Institute of Agrobiologically Sciences           | A study on the virus superfamily 1 helicase structure and function of the towards drug discovery and development | 52,000  | 156,000 | 1 April 2013     | 31 March 2016    | Japan |
| 71 | National Institute of Infectious Diseases                 | Construction of the foundation technologies for the MERS coronavirus natural host animal identification          | 49,400  | 148,200 | 1 April 2014     | 31 March 2017    | Japan |
| 72 | Soka University                                           | Pathogenesis of spongiform encephalopathy induced by viral infection                                             | 46,800  | 140,400 | 1 January 2010   | 31 December 2012 | Japan |

|    |                                                     |                                                                                                             |           |            |                |                  |       |
|----|-----------------------------------------------------|-------------------------------------------------------------------------------------------------------------|-----------|------------|----------------|------------------|-------|
| 73 | Nippon Veterinary and Life Science University       | Assembly mechanisms of coronaviruses                                                                        | 41,600    | 124,800    | 1 April 2013   | 31 March 2016    | Japan |
| 74 | Osaka University                                    | Understanding of viral replication through the interaction with coronavirus nsp1 and host proteins          | 44,200    | 88,400     | 1 April 2012   | 31 March 2014    | Japan |
| 75 | University of Yamanashi                             | The analysis of the mechanism of SARS coronavirus nsp1mediated mRNA decay                                   | 41,600    | 83,200     | 1 April 2013   | 31 March 2015    | Japan |
| 76 | Juntendo University                                 | Role of cd26 molecule in the infection of MERS and development of new therapy                               | 36,400    | 72,800     | 1 April 2014   | 31 March 2016    | Japan |
| 77 | National Agriculture and Food Research Organization | Elucidation of verification and virus dynamics of persistent infection in cattle body of cattle coronavirus | 54,600    | 54,600     | 1 April 2012   | 31 March 2013    | Japan |
| 78 | Erasmus Universitair Medisch Centrum Rotterdam      | European management platform for emerging and reemerging infectious disease entities                        | 3,736,307 | 18,681,536 | 1 May 2009     | 30 April 2014    | EU    |
| 79 | Universitat De Valencia                             | Variability in the mutation rate of RNA viruses                                                             | 335,093   | 1,675,465  | 1 January 2012 | 31 December 2016 | EU    |
| 80 | Universidad Politecnica De Madrid                   | Analysis of speciation mechanisms in RNA viruses                                                            | 84,564    | 253,691    | 1 July 2009    | 30 June 2012     | EU    |
| 81 | Eidgenoessisches Departement Des Innern             | Unravelling species barriers of coronaviruses                                                               | 109,641   | 219,281    | 1 May 2017     | 30 April 2019    | EU    |

**Table S2.** Researches related to platform for immunological response to viral infection and for vaccine development (Sub-cluster 1-2).

| NO | Organization                             | Title                                                                                  | Estimated Average Cost/Fiscal Year (USD) | Estimated Total Cost (USD) | Start date        | End date        | Geographic Region |
|----|------------------------------------------|----------------------------------------------------------------------------------------|------------------------------------------|----------------------------|-------------------|-----------------|-------------------|
| 1  | University of North Carolina Chapel Hill | Systems immunogenetics of biodefense and emerging pathogens in the collaborative cross | 2,437,629                                | 24,376,290                 | 5 August 2012     | 31 August 2022  | US                |
| 2  | University of Iowa                       | Pig SARS-COV host cell interactions and vaccine development                            | 1,598,570                                | 19,182,840                 | 1 August 2004     | 30 June 2016    | US                |
| 3  | University of North Carolina Chapel Hill | Systems immunogenetics of biodefense pathogens in the collaborative cross              | 4,354,308                                | 17,417,232                 | 5 August 2012     | 31 July 2016    | US                |
| 4  | Univ of Massachusetts Med Sch Worcester  | Immunity and virus disease                                                             | 397,961                                  | 13,530,674                 | 1 July 1980       | 31 March 2014   | US                |
| 5  | Cleveland Clinic Lerner Col/Med-Cwru     | Antiviral actions of interferons                                                       | 431,902                                  | 12,957,060                 | 30 September 1985 | 31 January 2015 | US                |
| 6  | University of Virginia Charlottesville   | Immune regulation of virus clearance and tissue injury at sites of infection           | 1,549,489                                | 7,747,445                  | 18 June 2009      | 31 May 2014     | US                |
| 7  | Dana-Farber Cancer Institute             | Broad spectrum neutralizing human abs to SARS and related coronaviruses                | 1,083,666                                | 5,418,330                  | 9 June 2010       | 31 May 2015     | US                |
| 8  | New York Blood Center                    | Structure-based design of coronavirus subunit vaccines                                 | 911,083                                  | 4,555,415                  | 21 May 2018       | 30 April 2023   | US                |
| 9  | Cleveland Clinic Lerner Col/Med-Cwru     | Immune regulation of CNS viral recrudescence                                           | 375,123                                  | 4,501,476                  | 15 May 2001       | 30 June 2012    | US                |
| 10 | New York Blood Center                    | Rational design and evaluation of novel mRNA vaccines against MERS-CoV                 | 844,900                                  | 4,224,500                  | 13 February 2018  | 31 January 2023 | US                |



|    |                                          |                                                                                |         |           |                   |                  |    |
|----|------------------------------------------|--------------------------------------------------------------------------------|---------|-----------|-------------------|------------------|----|
| 11 | University of North Carolina Chapel Hill | System immunogenetics of SARS-CoV infection                                    | 739,947 | 3,699,735 | 5 August 2012     | 31 July 2017     | US |
| 12 | Baylor College of Medicine               | RBD recombinant protein-based SARS vaccine for biodefense                      | 865,853 | 3,463,412 | 4 May 2012        | 30 April 2016    | US |
| 13 | New York Blood Center                    | Enhancing potency of the MERS vaccine by a novel asp1alum adjuvant combination | 690,074 | 3,450,370 | 1 August 2016     | 31 July 2021     | US |
| 14 | Planet Biotechnology Inc                 | A MERS-CoV receptor decoy                                                      | 600,081 | 2,400,324 | 1 June 2014       | 31 January 2018  | US |
| 15 | University of Pennsylvania               | Murine coronavirus neurovirulence role of type I interferon response           | 341,731 | 2,392,117 | 1 September 2012  | 31 May 2019      | US |
| 16 | The Johns Hopkins University             | Virus-like particle vaccine for SARS-CoV                                       | 386,641 | 2,319,846 | 15 April 2006     | 31 March 2012    | US |
| 17 | Trudeau Institute Inc                    | Regulation of memory cd8 t cell recruitment to the lung                        | 462,974 | 2,314,870 | 1 January 2008    | 31 December 2012 | US |
| 18 | Cleveland Clinic Lerner Col/Med-Cwru     | Regulation of b cells in the CNS                                               | 346,025 | 2,076,150 | 15 September 2013 | 30 June 2019     | US |
| 19 | University of Iowa                       | Balancing protection versus immunopathology by RSV-specific memory cd8 t cells | 376,900 | 1,507,600 | 1 August 2017     | 31 July 2021     | US |
| 20 | University of Illinois at Chicago        | Characterization of therapeutic human monoclonal antibodies against SARS       | 473,173 | 1,419,519 | 12 September 2009 | 31 August 2012   | US |
| 21 | University of Iowa                       | Role of anti-SARS-CoV t cell response in pathogenesis                          | 266,377 | 1,331,885 | 1 June 2011       | 31 May 2016      | US |

|    |                                          |                                                                                                      |         |           |                   |                  |    |
|----|------------------------------------------|------------------------------------------------------------------------------------------------------|---------|-----------|-------------------|------------------|----|
| 22 | Texas Tech University                    | Collaborative research modeling immune dynamics of RNA viruses in reservoir and nonreservoir species | 349,841 | 1,049,523 | 15 September 2015 | 31 August 2018   | US |
| 23 | Yale University                          | The effectiveness of vaccines in clinical practice                                                   | 157,391 | 944,346   | 1 August 2006     | 31 July 2012     | US |
| 24 | Dartmouth College                        | Structure function and antigenicity of coronavirus spike proteins                                    | 631,914 | 631,914   | 9 February 2017   | 31 December 2017 | US |
| 25 | Planet Biotechnology Inc                 | A mucosally targeted MERS-CoV vaccine produced in plants                                             | 236,488 | 472,976   | 17 February 2017  | 31 March 2018    | US |
| 26 | New York Blood Center                    | Critical neutralizing domain-based vaccines against new SARS like virus hCoVemc                      | 232,909 | 465,818   | 15 December 2013  | 30 November 2015 | US |
| 27 | Cornell University Ithaca                | Development of a subunit vaccine for MERS-CoV and other emerging coronaviruses                       | 196,146 | 392,292   | 6 June 2018       | 31 May 2020      | US |
| 28 | The University of Pittsburgh             | Preclinical evaluation of an adenoviral-based MERS-CoV vaccine                                       | 190,815 | 381,630   | 10 July 2015      | 30 June 2017     | US |
| 29 | University of Maryland Baltimore         | Inhibition of the innate immune response by the SARS coronavirus                                     | 108,000 | 324,000   | 1 July 2009       | 31 May 2012      | US |
| 30 | University of Iowa                       | A novel strategy for developing a SARS-CoV vaccine                                                   | 28,412  | 142,060   | 19 July 2011      | 30 June 2016     | US |
| 31 | University of North Carolina Chapel Hill | Unlocking zika virus immune control and pathogenesis with the collaborative cross                    | 135,110 | 135,110   | 1 August 2015     | 31 July 2016     | US |
| 32 | Protein Sciences Corporation             | Development of a coronavirus vaccine                                                                 | 13,416  | 134,160   | 26 September      | 30 November      | US |

|    |                                           |                                                                                              |         |         | 2003           | 2012             |       |
|----|-------------------------------------------|----------------------------------------------------------------------------------------------|---------|---------|----------------|------------------|-------|
| 33 | Protein Sciences Corporation              | Development of a recombinant SARS vaccine                                                    | 10,718  | 107,180 | 22 May 2003    | 30 November 2012 | US    |
| 34 | University of Iowa                        | Heteroclitic and modified t cell epitopes in coronavirus encephalomyelitis                   | 28,536  | 57,072  | 18 April 2011  | 17 April 2013    | US    |
| 35 | The University of Tokyo                   | Nlrp3 inflammasome control of by viral infection                                             | 111,800 | 223,600 | 1 April 2015   | 31 March 2017    | Japan |
| 36 | National Institute of Infectious Diseases | The development of a new vaccine against human coronavirus that causes severe pneumonia      | 48,100  | 144,300 | 1 April 2016   | 31 March 2019    | Japan |
| 37 | National Institute of Infectious Diseases | Analysis of effect of changes in cell entry pathway of coronavirus on innate immune response | 46,800  | 140,400 | 1 April 2017   | 31 March 2020    | Japan |
| 38 | National Institute of Infectious Diseases | Study for side effects of inactivated SARS-CoV vaccine.                                      | 44,563  | 133,689 | 1 January 2010 | 31 December 2012 | Japan |

**Table S3.** Platform for detection and point-of-care diagnostics (Sub-cluster 1-3).

| NO | Organization                           | Title                                                                                                                                          | Estimated Average Cost/Fiscal Year (USD) | Estimated Total Cost (USD) | Start date        | End date          | Geographic Region |
|----|----------------------------------------|------------------------------------------------------------------------------------------------------------------------------------------------|------------------------------------------|----------------------------|-------------------|-------------------|-------------------|
| 1  | Medical College of Wisconsin           | Rapid point of care diagnostic for bioterrorism                                                                                                | 1,526,585                                | 9,159,510                  | 1 September 2006  | 31 August 2012    | US                |
| 2  | Manipal Academy of Higher Education    | Gh13003 hospital-based surveillance of acute febrile illness in western GHAT region of                                                         | 1,557,522                                | 7,787,610                  | 30 September 2013 | 29 September 2018 | US                |
| 3  | Columbia University Health Sciences    | Diagnostic and prognostic biomarkers for viral severe lung disease                                                                             | 1,131,261                                | 5,656,305                  | 7 March 2014      | 28 February 2019  | US                |
| 4  | Laval University                       | Point of care microfluidic diagnosis system for rapid and sensitive detection of                                                               | 811,888                                  | 4,059,440                  | 1 July 2010       | 30 June 2015      | US                |
| 5  | Medical College of Wisconsin           | Multiple POC device for antigen molecular detection of influenza other viruses                                                                 | 456,807                                  | 2,740,842                  | 8 July 2008       | 30 June 2014      | US                |
| 6  | University of California San Francisco | A rapid pan viral microarray diagnostic for category ac biodefense pathogens                                                                   | 888,279                                  | 2,664,837                  | 9 August 2010     | 30 June 2013      | US                |
| 7  | Boston College                         | New genetic tools for comparative analysis of emerging viruses and virus-host molecular interactions in reservoir hosts versus spillover hosts | 313,000                                  | 626,000                    | 1 April 2018      | 30 September 2019 | US                |
| 8  | Akonni Biosystems Inc                  | Respiratory panel flow strips a point of care molecular diagnostic test                                                                        | 300,000                                  | 300,000                    | 1 March 2012      | 28 February 2013  | US                |
| 9  | Crosslife Technologies, Inc.           | SBIR phase I rapid instrument free nucleic acid test for pathogens and biothreats                                                              | 224,929                                  | 224,929                    | 1 June 2017       | 31 May 2018       | US                |
| 10 | Arizona State University-Tempe Campus  | Isolating viral particles from whole blood                                                                                                     | 69,165                                   | 207,495                    | 7 February        | 31 January        | US                |

|    |                                                      |                                                                                                                                                          |         |         | 2012            | 2015                |       |
|----|------------------------------------------------------|----------------------------------------------------------------------------------------------------------------------------------------------------------|---------|---------|-----------------|---------------------|-------|
| 11 | University of Virginia<br>Charlottesville            | Yeast based assays for chemical screens against<br>SARS-CoV targets                                                                                      | 38,500  | 154,000 | 15 June<br>2008 | 28 February<br>2012 | US    |
| 12 | Tulane University of<br>Louisiana                    | Epithelial cells lining salivary gland ducts are early<br>target of SARS-CoV                                                                             | 37,186  | 37,186  | 1 May 2011      | 30 April<br>2012    | US    |
| 13 | office of Internatl Science<br>&Engineering          | Eapsi rapid smartphone-based paper assay fabrication<br>for sensitive and specific detection of middle east<br>respiratory syndrome coronavirus MERS-CoV | 5,400   | 5,400   | 1 June 2016     | 31 May 2017         | US    |
| 14 | Kyoto Prefectural<br>University of Medicine          | Metagenomic research of virus infections in human<br>clinical specimens by high-throughput DNA<br>sequencing in Thailand                                 | 187,200 | 561,600 | 1 April<br>2011 | 31 March<br>2014    | Japan |
| 15 | Nihon University                                     | Establishment of gene diagnosis of feline infectious<br>peritonitis by the analysis of the viral genome                                                  | 44,200  | 132,600 | 1 April<br>2015 | 31 March<br>2018    | Japan |
| 16 | Erasmus Universitair<br>Medisch Centrum<br>Rotterdam | Early detection of emerging viruses by next<br>generation in situ hybridization                                                                          | 102,946 | 205,891 | 1 July 2014     | 30 June 2016        | EU    |

**Table S4.** Structure-activity relationship modeling based virus prediction and activity modulation (Sub-cluster 2-1).

| NO | Organization                     | Title                                                                                                                 | Estimated Average Cost/Fiscal Year (USD) | Estimated Total Cost (USD) | Start date       | End date         | Geographic Region |
|----|----------------------------------|-----------------------------------------------------------------------------------------------------------------------|------------------------------------------|----------------------------|------------------|------------------|-------------------|
| 1  | Blood Systems Research Institute | Modeling viral entry and its inhibition using SARS-CoV                                                                | 406,843                                  | 2,034,215                  | 15 December 2007 | 30 November 2012 | US                |
| 2  | Harvard University               | Structure and mechanism of programmed ribosomal frameshifting in SARS coronavirus                                     | 375,687                                  | 1,127,061                  | 7 February 2013  | 31 January 2016  | US                |
| 3  | Osaka University                 | Elucidation of the establishment and the virulence factors of reverse genetic manipulation system of MERS coronavirus | 48,100                                   | 144,300                    | 1 April 2016     | 31 March 2019    | Japan             |
| 4  | The University of Tokyo          | Using the data assimilation technology construction of multiscale infection propagation model and evaluation          | 19,000                                   | 57,000                     | 1 January 2011   | 31 December 2013 | Japan             |
| 5  | Yamaguchi University             | Analysis of coronavirus evolution mechanism for the purpose of appearance prediction emerging coronavirus             | 21,700                                   | 43,400                     | 24 April 2015    | 31 March 2017    | Japan             |
| 6  | Katholieke Universiteit Leuven   | Virus discovery and epidemic tracing from high throughput metagenomic sequencing                                      | 1,168,428                                | 3,505,285                  | 1 June 2015      | 31 May 2018      | EU                |

**Table S5.** Studies on design of antiviral agents based on the structure and function of viral and human receptor proteins in Korea (Sub-cluster 2-2).

| NO | Organization                             | Title                                                                                                             | Estimated Average Cost/Fiscal Year (USD) | Estimated Total Cost (USD) | Start date        | End date          | Geographic Region |
|----|------------------------------------------|-------------------------------------------------------------------------------------------------------------------|------------------------------------------|----------------------------|-------------------|-------------------|-------------------|
| 1  | University of Alabama at Birmingham      | Antiviral drug discovery and development center overall                                                           | 6,948,532                                | 34,742,660                 | 1 March 2014      | 28 February 2019  | US                |
| 2  | University of North Carolina Chapel Hill | Broad spectrum antiviral GS-5734 to treat MERS-CoV and related emerging CoV                                       | 1,310,955                                | 6,554,775                  | 9 August 2017     | 31 July 2022      | US                |
| 3  | University of Alabama at Birmingham      | Inhibitors of coronavirus fidelity and cap methylation as broadly applicable                                      | 996,397                                  | 4,981,985                  | 1 March 2014      | 28 February 2019  | US                |
| 4  | Phelix Therapeutics, LLC                 | Cathepsin I inhibitors as pan coronavirus therapeutics                                                            | 1,460,695                                | 4,382,085                  | 1 March 2015      | 28 February 2018  | US                |
| 5  | Kansas State University                  | Small molecule protease inhibitors against MERS-CoV                                                               | 775,916                                  | 3,879,580                  | 15 May 2018       | 30 April 2023     | US                |
| 6  | The Johns Hopkins University             | Applying human factors and mathematical modeling approaches to prevent transmission of high consequence pathogens | 1,222,700                                | 3,668,100                  | 30 September 2015 | 29 September 2018 | US                |
| 7  | University of Minnesota Twin Cities      | Receptor recognition and cell entry of coronaviruses                                                              | 457,831                                  | 2,289,155                  | 7 June 2016       | 31 May 2021       | US                |
| 8  | Emory University                         | Nox1 and nox2 as therapeutic targets in influenza                                                                 | 359,366                                  | 2,156,196                  | 1 July 2012       | 30 June 2018      | US                |
| 9  | University of Minnesota Twin Cities      | Receptor recognition mechanisms of coronaviruses                                                                  | 369,995                                  | 1,849,975                  | 15 May 2010       | 30 April 2015     | US                |
| 10 | University of North Carolina Chapel Hill | Platforms for synthesis and testing of emerging and zoonotic viruses                                              | 614,822                                  | 1,844,466                  | 1 March 2011      | 28 February 2014  | US                |
| 11 | University of Alabama at Birmingham      | Novel nucleic acid binding proteins in emerging viruses                                                           | 312,952                                  | 1,564,760                  | 1 August 2016     | 31 May 2021       | US                |

|    |                                   |                                                                                   |         |           |                   |                   |    |
|----|-----------------------------------|-----------------------------------------------------------------------------------|---------|-----------|-------------------|-------------------|----|
| 12 | University of Illinois at Chicago | Development of plpro and 3clpro protease inhibitors as novel SARS therapeutics    | 758,511 | 1,517,021 | 26 July 2010      | 25 July 2012      | US |
| 13 | Kineta Inc                        | Development of novel isoflavone drugs as broad-spectrum antivirals                | 752,081 | 1,504,162 | 22 June 2016      | 31 May 2018       | US |
| 14 | Blood Systems Research Institute  | Broad spectrum antivirals targeting envelope proteolysis and viral uncoating      | 249,518 | 748,554   | 1 June 2013       | 31 May 2016       | US |
| 15 | Drexel University                 | Coronavirus modulation of cellular microRNAs in the liver role in hepatitis       | 212,438 | 637,314   | 29 August 2011    | 31 July 2014      | US |
| 16 | Cornell University Ithaca         | Spike protein cleavage activation and emergence of coronaviruses with extended tr | 209,452 | 628,356   | 15 August 2014    | 31 July 2017      | US |
| 17 | Cornell University Ithaca         | Priming and fusion activation of the SARS coronavirus spike glycoprotein          | 190,575 | 571,725   | 25 June 2009      | 31 May 2012       | US |
| 18 | New York Blood Center             | A novel nanobody with good druggability to prevent and treat MERS-CoV infection   | 241,450 | 482,900   | 8 December 2016   | 30 November 2018  | US |
| 19 | Autoimmune Technologies LLC       | Peptide inhibitors of coronavirus entry                                           | 225,000 | 450,000   | 15 June 2014      | 31 May 2016       | US |
| 20 | Glsynthesis Inc                   | Solid state synthesis and applications of oligophenyleneethynes                   | 191,458 | 382,916   | 1 July 2010       | 30 June 2012      | US |
| 21 | University of Maryland Baltimore  | Repurposing of abl kinase inhibitors for treatment of coronavirus infections      | 41,673  | 125,019   | 1 February 2015   | 31 January 2018   | US |
| 22 | Vanderbilt University             | Coronavirus antiviral nucleoside analogs inhibition and reduced susceptibility    | 28,966  | 86,898    | 30 September 2017 | 29 September 2020 | US |
| 23 | Dynport Vaccine Company, Llc      | Phase I clinical trial unit for therapeutics phase I trial for MERS-CoV           | 59,564  | 59,564    | 19 August 2016    | 5 December 2016   | US |



|    |                                               |                                                                                                                                          |         |         |                  |                  |       |
|----|-----------------------------------------------|------------------------------------------------------------------------------------------------------------------------------------------|---------|---------|------------------|------------------|-------|
| 24 | Vanderbilt University                         | Viral protein determinants of coronavirus replication fidelity                                                                           | 49,214  | 49,214  | 1 September 2013 | 31 August 2014   | US    |
| 25 | Tokyo University of Pharmacy and Life Science | Integrated medicinal chemistry research of intractable diseases based on peptidic small molecules                                        | 182,000 | 728,000 | 1 April 2011     | 31 March 2015    | Japan |
| 26 | Kyoto Pharmaceutical University               | Design of nonpeptide inhibitors based on structure analyses of the protease inhibitor complex                                            | 52,000  | 156,000 | 1 April 2013     | 31 March 2016    | Japan |
| 27 | Nippon Veterinary and Life Science University | The development of specific anti-coronavirus drugs using the novel glycosidase inhibitors                                                | 48,100  | 144,300 | 1 April 2016     | 31 March 2019    | Japan |
| 28 | Nippon Veterinary and Life Science University | Development of endosome targeted peptide inhibitors against enveloped viruses via endosomal pathway.                                     | 44,200  | 88,400  | 1 January 2011   | 31 December 2012 | Japan |
| 29 | Tokyo University of Pharmacy and Life Science | Study on medicinal chemistry of reversible cysteine protease inhibitors for the treatment of infectious diseases                         | 37,700  | 75,400  | 1 January 2011   | 31 December 2012 | Japan |
| 30 | Tokyo University of Pharmacy and Life Science | Development of nonpeptide type SARS virus protease inhibitors with aryl ketone structure                                                 | 16,000  | 32,000  | 1 January 2011   | 31 December 2012 | Japan |
| 31 | University of Bristol                         | Synthesis of smart virus like hierarchical structures based on polymer peptide conjugates and the potential application in drug delivery | 122,285 | 244,569 | 1 July 2012      | 30 June 2014     | EU    |

**Table S6.** Infectious Disease Epidemiological Investigation & Animal and Environmental Ecology (Cluster 3).

| NO | Organization                           | Title                                                                                                            | Estimated Average Cost/Fiscal Year (USD) | Estimated Total Cost (USD) | Start date        | End date          | Geographic Region |
|----|----------------------------------------|------------------------------------------------------------------------------------------------------------------|------------------------------------------|----------------------------|-------------------|-------------------|-------------------|
| 1  | Leidos Biomedical Research, Inc.       | IGF::OT::IGF operation of government-owned contractor-operated (GOCO) R&D facilities                             | 9,820,006                                | 49,100,031                 | 26 September 2015 | 25 September 2020 | US                |
| 2  | Leidos Biomedical Research, Inc.       | Respiratory viruses research                                                                                     | 4,662,028                                | 23,310,140                 | 26 September 2015 | 25 September 2020 | US                |
| 3  | Leidos Biomedical Research, Inc.       | Emerging/re-emerging and related respiratory diseases NIAID/DCR                                                  | 2,256,233                                | 22,562,327                 | 26 September 2008 | 25 September 2018 | US                |
| 4  | George Washington University           | Ecology of MERS-CoV in camels humans and wildlife in Ethiopia                                                    | 2,487,071                                | 9,948,284                  | 1 September 2018  | 31 August 2022    | US                |
| 5  | Montana State University - Bozeman     | Dynamics of zoonotic systems human bat pathogen interactions                                                     | 1,650,000                                | 6,600,000                  | 1 September 2017  | 31 August 2021    | US                |
| 6  | Dynport Vaccine Company, Llc           | Phase i clinical trial unit for therapeutics against infectious diseases evaluation of therapeutics for MERS-CoV | 857,452                                  | 2,572,356                  | 23 August 2016    | 28 June 2019      | US                |
| 7  | Ecohealth Alliance Inc                 | Risk of viral emergence from bats                                                                                | 503,136                                  | 2,515,680                  | 18 September 2008 | 31 August 2013    | US                |
| 8  | Wadsworth Center                       | Emerging infectious diseases training program                                                                    | 222,675                                  | 2,449,425                  | 1 July 2004       | 31 July 2015      | US                |
| 9  | Harvard School of Public Health        | Epidemiology of infectious diseases and biodefense                                                               | 135,759                                  | 2,172,144                  | 30 September 1998 | 31 May 2014       | US                |
| 10 | Fred Hutchinson Cancer Research Center | Realtime tracking of virus evolution for vaccine strain selection and epidemiological investigation              | 409,400                                  | 2,047,000                  | 23 August         | 31 May 2021       | US                |

| 2016 |                                           |                                                                                                         |         |           |                   |                |       |
|------|-------------------------------------------|---------------------------------------------------------------------------------------------------------|---------|-----------|-------------------|----------------|-------|
| 11   | University of Michigan at Ann Arbor       | Career wastewater treatment as a conduit and control of emerging respiratory viruses in the environment | 400,000 | 2,000,000 | 1 May 2014        | 30 April 2019  | US    |
| 12   | University of Utah                        | Epidemiology and etiology of hospitalized pneumonia in children                                         | 555,082 | 1,665,246 | 1 September 2009  | 31 August 2012 | US    |
| 13   | North Carolina State University Raleigh   | Career big computation and the management of emerging infectious diseases                               | 180,310 | 901,550   | 1 June 2016       | 31 May 2021    | US    |
| 14   | University of Colorado Denver             | Epidemiology and pathogenesis of novel coronaviruses                                                    | 132,300 | 793,800   | 1 May 2008        | 30 April 2014  | US    |
| 15   | Pasteur Institute from Madagascar         | Investigating seasonal drivers of viral zoonoses from Madagascar fruit bats                             | 134,900 | 674,500   | 2 May 2017        | 30 April 2022  | US    |
| 16   | University of California Davis            | Epidemiology of zoonotic viruses in forest communities in a key biodiversity area of rural myanmar      | 121,699 | 608,495   | 15 June 2016      | 31 May 2021    | US    |
| 17   | Arizona State University-Tempe Campus     | Iii small data management for real time data driven epidemic spread simulations                         | 157,296 | 471,888   | 1 September 2013  | 31 August 2016 | US    |
| 18   | University of Maryland Baltimore          | Diabetic comorbidity and MERS coronavirus pathogenesis                                                  | 214,359 | 428,718   | 13 June 2016      | 31 May 2018    | US    |
| 19   | National Academy of Sciences              | Forum on microbial threats                                                                              | 60,000  | 300,000   | 12 September 2014 | 31 August 2019 | US    |
| 20   | University of Maryland Baltimore          | The role of diabetes in middle east respiratory syndrome coronavirus pathogenesis                       | 58,282  | 116,564   | 1 August 2018     | 31 July 2020   | US    |
| 21   | Colorado State University-Fort Collins    | 2nd international infectious diseases of bats symposium                                                 | 6,000   | 6,000     | 1 May 2017        | 30 April 2018  | US    |
| 22   | Nagoya University                         | Appearance prediction of fruit bats from emerging infectious diseases in southeast Asia and Oceania     | 172,900 | 864,500   | 1 April 2013      | 31 March 2018  | Japan |
| 23   | National Institute of Infectious Diseases | Survey of middle east respiratory syndrome coronavirus of the dromedary in Ethiopia                     | 137,800 | 413,400   | 1 April 2017      | 31 March       | Japan |

| 2020 |                                                      |                                                                                                                                                       |           |            |                    |                        |    |
|------|------------------------------------------------------|-------------------------------------------------------------------------------------------------------------------------------------------------------|-----------|------------|--------------------|------------------------|----|
| 24   | Erasmus Universitair<br>Medisch Centrum<br>Rotterdam | Anticipating the global onset of novel epidemics                                                                                                      | 3,670,585 | 18,352,925 | 1 November<br>2011 | 31 October<br>2016     | EU |
| 25   | Victoriano Martinez<br>Riomansa Sl                   | A novel filtration technology targeted at enhancing<br>the European healthcare systems efforts in restraining<br>the spread of the hospital infection | 749,257   | 1,498,514  | 1 January<br>2011  | 31<br>December<br>2012 | EU |

**Table S7.** Researches related to mechanisms of infection, the life cycle of SARS-CoV-2, and identification of virus-host interaction mechanism in Korea (Sub-cluster 1-1).

| NO | Organization                  | Title                                                                                                                                                                                                       | Estimated Average Cost/Fiscal Year (USD) | Estimated Total Cost (USD) | Start date       | End date         |
|----|-------------------------------|-------------------------------------------------------------------------------------------------------------------------------------------------------------------------------------------------------------|------------------------------------------|----------------------------|------------------|------------------|
| 1  | National Institutes of Health | Severe acute respiratory syndrome (SARS) pathogenesis and treatment method development using a porcine coronavirus infection model                                                                          | 24,545                                   | 24,545                     | 1 July 2005      | 1 July 2006      |
| 2  | Kookmin University            | A study on the enzymatic characterization of virus helix enzyme in severe acute respiratory syndrome                                                                                                        | 31,818                                   | 31,818                     | 1 December 2005  | 1 November 2006  |
| 3  | Kookmin University            | Reaction mechanism study on SARS Coronavirus helicase and its applications to develop the inhibitors                                                                                                        | 45,736                                   | 137,209                    | 1 November 2013  | 31 October 2016  |
| 4  | Kangwon National University   | Database construction and collection of zoonotic pathogens in Korea                                                                                                                                         | 89,091                                   | 445,455                    | 1 July 2010      | 31 July 2015     |
| 5  | Kyungpook National University | Functional studies on roles of MAPK signaling pathways in porcine coronavirus replication                                                                                                                   | 37,030                                   | 111,091                    | 1 September 2012 | 31 August 2015   |
| 6  | Chonbuk National University   | A study for zoonotic potential of Staphylococcus spp. in wildlife ecosystem: anti-microgram and molecular characterization                                                                                  | 44,093                                   | 132,279                    | 1 November 2016  | 31 October 2019  |
| 7  | Kyungpook National University | Functional studies on roles of intracellular signaling pathways in novel porcine delta coronavirus replication                                                                                              | 30,704                                   | 92,111                     | 1 November 2015  | 31 October 2018  |
| 8  | Chonbuk National University   | A genetic characteristic study for zoonotic potential of several pathogens from bat in Korea: Molecular characterization and identification of zoonotic viruses and parasites from bat using next genera... | 15,152                                   | 45,455                     | 1 June 2018      | 31 May 2021      |
| 9  | Kyungpook National University | Investigation of virulence factors for porcine epidemic diarrhea virus and development of reverse genetics-based attenuated vaccine platform                                                                | 6,818                                    | 34,091                     | 1 June 2018      | 31 May 2023      |
| 10 | Kookmin University            | Reaction mechanism study on MERS Coronavirus helicase in the process of viral genome replication                                                                                                            | 30,303                                   | 90,909                     | 1 March 2020     | 28 February 2023 |

|    |                                                              |                                                                                                                                                      |         |         |                  |                  |
|----|--------------------------------------------------------------|------------------------------------------------------------------------------------------------------------------------------------------------------|---------|---------|------------------|------------------|
| 11 | Hallym University                                            | Study on mechanisms of hepatitis C virus replication using host cellular proteins                                                                    | 181,818 | 363,636 | 1 June 2016      | 31 May 2018      |
| 12 | Gyeongsang National University                               | Development of antiviral biomaterial based on the glycosidase and protease                                                                           | 34,545  | 172,727 | 1 May 2009       | 31 March 2014    |
| 13 | Kookmin University                                           | Mechanistic study on SARS Coronavirus helicase in the process of viral genome replication                                                            | 18,272  | 54,816  | 1 September 2010 | 31 August 2013   |
| 14 | Chosun University                                            | Study on interaction between virus and membrane microdomains using model systems                                                                     | 9,091   | 45,455  | 1 June 2018      | 31 May 2023      |
| 15 | Chungnam National University                                 | Identification of mechanism of coronavirus cross-species transmission and pathogenesis mediated by host proteases                                    | 45,455  | 136,364 | 1 March 2020     | 28 February 2023 |
| 16 | Chungnam National University                                 | Studies on the mechanism of the emergency of mutant coronaviruses with the deletion in the spike protein and its application                         | 26,515  | 79,545  | 1 June 2017      | 31 May 2020      |
| 17 | Chonbuk National University                                  | Genetic and Biological characterization of important fungi from bats in Korea                                                                        | 11,364  | 34,091  | 1 June 2019      | 31 May 2022      |
| 18 | Kyungpook National University                                | Functional characterization of the interaction between the porcine epidemic diarrhea virus (PEDV) spike (S) protein and its cellular receptor        | 25,909  | 51,818  | 1 May 2009       | 30 April 2011    |
| 19 | Chonbuk National University                                  | Investigation on the infection mechanism and the control of RNA viruses through monoclonal antibody                                                  | 6,363   | 31,813  | 1 September 2010 | 31 August 2015   |
| 20 | Kookmin University                                           | Mechanistic studies on the helicase of MERS coronavirus                                                                                              | 60,606  | 181,818 | 1 March 2017     | 29 February 2020 |
| 21 | Hallym University                                            | Metagenomic study and molecular screening of rodent (Apodemus agrarius)-borne biothreat viruses using next-generation sequencing and targeted RT-PCR | 34,091  | 68,182  | 1 June 2019      | 31 May 2021      |
| 22 | Dankook University                                           | Influence of heavy metal in the ultrafine particulate matter on the respiratory virus infection and respiratory inflammation                         | 20,273  | 60,818  | 1 June 2019      | 31 May 2022      |
| 23 | Gunsan University Industry-University Cooperation Foundation | Investigation of the substrate recognition mechanism and development of natural inhibitors of SARS 3CL protease                                      | 15,152  | 45,455  | 1 May 2010       | 30 April 2013    |

|    |                                       |                                                                                                                                      |         |         |                 |                  |
|----|---------------------------------------|--------------------------------------------------------------------------------------------------------------------------------------|---------|---------|-----------------|------------------|
| 24 | Hallym University                     | Development of Spike protein expression technology for each genotype of swine pandemic virus                                         | 61,364  | 61,364  | 1 June 2011     | 31 May 2012      |
| 25 | Hallym University                     | Development of Spike gene recombination protein expression technology for porcine coronavirus diagnosis                              | 57,273  | 57,273  | 1 June 2010     | 31 May 2011      |
| 26 | Seoul National University Hospital    | A study on viral shedding of MERS-CoV                                                                                                | 81,818  | 163,636 | 1 November 2015 | 31 October 2017  |
| 27 | Kyunghee University                   | Development of transgenic mouse models for middle east respiratory syndrome coronavirus infection                                    | 34,091  | 136,364 | 3 December 2015 | 30 November 2019 |
| 28 | Chungnam National University Hospital | Virus and Antibody kinetics of MERS-CoV confirmed cases                                                                              | 40,909  | 81,818  | 1 November 2015 | 31 October 2017  |
| 29 | Kookmin University                    | Screening of RNA aptamers that specifically bind to Nucleocapsid and Spike proteins of SARS Coronavirus and inhibit their activities | 25,000  | 50,000  | 1 May 2009      | 31 March 2011    |
| 30 | Chungbuk National University          | Phylogenetic study of SARS-coronavirus and new virus                                                                                 | 102,727 | 102,727 | 1 June 2003     | 1 May 2004       |
| 31 | Hallym University                     | Researches on Viral Infectious Diseases                                                                                              | 10,707  | 96,364  | 1 June 2005     | 1 February 2014  |
| 32 | Center for Disease Control            | Immunogenicity of SARS-CoV receptor binding protein expressed on coxsackie viral vector                                              | 30,455  | 60,909  | 1 January 2010  | 31 December 2011 |
| 33 | WizTul BioLab                         | Improved high-efficiency T4 DNA ligase                                                                                               | 60,636  | 60,636  | 1 June 2016     | 28 February 2017 |
| 34 | Kyungpook National University         | Molecular characterization and diagnostic tool development of porcine delta coronavirus in Korea                                     | 54,735  | 109,471 | 1 January 2016  | 31 December 2017 |
| 35 | Animal and Plant Quarantine Agency    | Genetic analysis of swine pandemic virus                                                                                             | 8,727   | 43,636  | 1 August 2003   | 1 December 2007  |
| 36 | Animal and Plant Quarantine Agency    | Porcine virus diarrhea hospital human investigation                                                                                  | 2,727   | 13,636  | 1 June 2003     | 1 December 2007  |
| 37 | Animal and Plant Quarantine Agency    | Animal pathogenic virus genome construction research                                                                                 | 30,303  | 90,909  | 1 January       | 31 December      |

---

|  |      |      |
|--|------|------|
|  | 2008 | 2010 |
|--|------|------|

---



**Table S8.** Researches related to platform for immunological response to viral infection and for vaccine development in Korea (Sub-cluster 1-2).

| NO | Organization                                    | Title                                                                                                     | Estimated Average Cost/Fiscal Year (USD) | Estimated Total Cost (USD) | Start date      | End date         |
|----|-------------------------------------------------|-----------------------------------------------------------------------------------------------------------|------------------------------------------|----------------------------|-----------------|------------------|
| 1  | Korea Research Institute of Chemical Technology | Development of convergence solution for new virus infection                                               | 13,167,521                               | 26,335,042                 | 1 August 2016   | 31 December 2017 |
| 2  | Korea Institute of Oriental Medicine            | Convergent solution for emerging virus infection                                                          | 303,030                                  | 909,091                    | 1 August 2016   | 31 July 2019     |
| 3  | Korea University                                | Development of next-generation universal vaccine to control viral infectious diseases                     | 181,818                                  | 181,818                    | 1 December 2015 | 30 November 2016 |
| 4  | Seoul National University                       | Development of therapeutic antibodies against Middle East respiratory syndrome coronavirus and Zika virus | 99,273                                   | 496,364                    | 1 July 2016     | 31 March 2021    |
| 5  | Seoul National University                       | The Interferon-targeting therapeutic mechanism to overcome the pandemic respiratory viral infection       | 20,833                                   | 125,000                    | 1 June 2016     | 31 May 2022      |
| 6  | Seoul National University                       | Identification of TFH differentiation and target AGS for MERS-CoV vaccine using virus-like particles      | 90,909                                   | 272,727                    | 1 March 2017    | 29 February 2020 |
| 7  | Chonnam National University                     | Establishment of experimental models for evaluating the safety and efficacy of antiviral drugs            | 131,091                                  | 655,455                    | 1 May 2009      | 31 March 2014    |
| 8  | Celltrion Co., Ltd.                             | Development of Therapeutic Antibody for MERS-coronavirus                                                  | 212,121                                  | 636,364                    | 3 December 2015 | 30 November 2018 |
| 9  | Catholic University                             | Development of Middle East Respiratory Syndrome Coronavirus (MERS-CoV) based on RNA vaccine platform      | 128,773                                  | 515,091                    | 3 December 2015 | 30 November 2019 |

|    |                                                          |                                                                                                                                            |         |         |                 |                  |
|----|----------------------------------------------------------|--------------------------------------------------------------------------------------------------------------------------------------------|---------|---------|-----------------|------------------|
| 10 | Korea Research Institute of Bioscience and Biotechnology | Development of Immunogen Candidates for the MERS Vaccine                                                                                   | 110,795 | 443,182 | 3 December 2015 | 30 November 2019 |
| 11 | Korea Central Academy                                    | Development of animal model-based evaluation system for the MERS vaccine candidates                                                        | 89,489  | 357,955 | 3 December 2015 | 30 November 2019 |
| 12 | International Vaccine Research Institute                 | Discovery of MERS-CoV vaccine Candidate and Evaluation of Vaccine efficacy using in vitro system                                           | 79,545  | 318,182 | 3 December 2015 | 30 November 2019 |
| 13 | Seoul National University                                | The verification of clinical efficacy and preventive effect for MERS-CoV mucosal vaccine candidate against respiratory viral infection     | 47,341  | 189,364 | 3 December 2015 | 30 November 2019 |
| 14 | Korea University                                         | Evaluation of neutralization of therapeutic antibody against MERS-coronavirus                                                              | 45,455  | 136,364 | 3 December 2015 | 30 November 2018 |
| 15 | National Medical Center                                  | Immune response against MERS-Coronavirus infection in humans                                                                               | 40,909  | 81,818  | 1 November 2015 | 31 October 2017  |
| 16 | Chonbuk National University                              | Development of experimental live attenuated MERS-CoV vaccines                                                                              | 119,318 | 477,273 | 3 December 2015 | 30 November 2019 |
| 17 | Korea Research Institute of Bioscience and Biotechnology | Evaluation of safety and immunogenicity of Middle East Respiratory Syndrome Coronavirus (MERS-CoV) vaccine candidates in non-human primate | 61,364  | 122,727 | 1 October 2018  | 30 November 2019 |
| 18 | Konkuk University                                        | MERS-CoV eS1-770 vaccine antigen construction and efficacy evaluation                                                                      | 118,182 | 472,727 | 17 December     | 30 November      |

|    |                                                          |                                                                                                                                                                                                   |         |         | 2015            | 2019             |
|----|----------------------------------------------------------|---------------------------------------------------------------------------------------------------------------------------------------------------------------------------------------------------|---------|---------|-----------------|------------------|
| 19 | Seoul Asan Hospital                                      | Prediction of weaning from veno-venous extracorporeal membrane oxygenation in adult patients with severe acute respiratory failure: Korean Extracorporeal Lung Support Organization (KELSO) score | 59,091  | 118,182 | 11 May 2016     | 31 October 2017  |
| 20 | Konyang University                                       | Immune response to SARS coronavirus N antigen and vaccine candidate study                                                                                                                         | 45,455  | 45,455  | 1 December 2005 | 1 December 2006  |
| 21 | Center for Disease Control                               | Development of therapeutic monoclonal antibodies against MERS-CoV infection                                                                                                                       | 332,727 | 998,182 | 1 January 2016  | 31 December 2018 |
| 22 | Korea Research Institute of Chemical Technology          | Development of human DPP4 expressing transgenic mouse                                                                                                                                             | 90,909  | 272,727 | 22 July 2016    | 31 December 2018 |
| 23 | Yonsei University                                        | Development of fluorescence expressing MERS-CoV for drug and vaccine evaluation                                                                                                                   | 90,909  | 181,818 | 27 June 2016    | 31 December 2017 |
| 24 | Korea Research Institute of Bioscience and Biotechnology | Purification of MERS-CoV antigen and Production of ELISA kit                                                                                                                                      | 123,966 | 123,966 | 20 June 2016    | 31 December 2016 |
| 25 | Korea University                                         | Construction of trimeric MERS-CoV Spike protein for screening of antibodies against MERS-CoV                                                                                                      | 72,727  | 72,727  | 1 November 2016 | 31 August 2017   |
| 26 | Osong Medical Innovation Foundation                      | Screening of high affinity MERS-CoV monoclonal antibodies using phage display library                                                                                                             | 54,545  | 54,545  | 24 October 2016 | 23 December 2016 |
| 27 | Konyang University                                       | SARS coronavirus nucleocapsid DNA vaccine development                                                                                                                                             | 60,000  | 60,000  | 1 July 2006     | 1 April 2007     |
| 28 | Center for Disease Control                               | Development and evaluation of an avirulent MERS-CoV                                                                                                                                               | 121,212 | 363,636 | 1 January       | 31               |

|    |                                                       |                                                                                                                           |         |         |                     |                        |
|----|-------------------------------------------------------|---------------------------------------------------------------------------------------------------------------------------|---------|---------|---------------------|------------------------|
|    |                                                       | for vaccine candidate                                                                                                     |         |         | 2019                | December<br>2021       |
| 29 | Center for Disease Control                            | Validation of MERS-CoV broadly neutralizing antibodies in mouse in vivo for practical use                                 | 121,212 | 363,636 | 1 January<br>2019   | 31<br>December<br>2021 |
| 30 | Korea University                                      | Construction of respiratory viral immunogenic protein probes for screening of neutralizing antibodies                     | 36,364  | 72,727  | 6 February<br>2017  | 31<br>December<br>2018 |
| 31 | Center for Disease Control                            | Expression and immunogenicity study of Cocksackievirus vector of SARS-CoV receptor binding protein                        | 28,788  | 86,364  | 1 January<br>2008   | 31<br>December<br>2010 |
| 32 | Korea Technology Exchange                             | Development of VSF for the treatment of viral diseases                                                                    | 17,273  | 17,273  | 1 May 2003          | 1 December<br>2003     |
| 33 | Catholic University                                   | Development of standard protocol for measuring the amount of vaccine candidate and the titer of antibody for MERS-CoV (1) | 154,545 | 309,091 | 16 February<br>2016 | 30<br>November<br>2017 |
| 34 | Sejong University                                     | Evaluation of the in vitro and in vivo efficacy of adjuvants for MERS-vaccine (1)                                         | 90,909  | 181,818 | 16 February<br>2016 | 30<br>November<br>2017 |
| 35 | Chonbuk National University                           | Development of standard protocol for measuring the amount of vaccine candidate and the titer of antibody for MERS-CoV (2) | 22,727  | 45,455  | 16 February<br>2016 | 30<br>November<br>2017 |
| 36 | National Institute of Food and Drug Safety Evaluation | Study on the establishment of testing method for antibody titer and reference sera for evaluation of virus vaccine        | 290,909 | 581,818 | 1 January<br>2019   | 31<br>December<br>2020 |

|    |                                                                   |                                                                                                                                                                         |         |         |                   |                        |
|----|-------------------------------------------------------------------|-------------------------------------------------------------------------------------------------------------------------------------------------------------------------|---------|---------|-------------------|------------------------|
| 37 | Agriculture, Forestry and<br>Livestock Quarantine<br>Headquarters | Development of killed vaccine against PEDV, PDCoV and<br>Rotavirus in pig                                                                                               | 5,779   | 11,557  | 1 January<br>2018 | 31<br>December<br>2019 |
| 38 | Korea B & P Co., Ltd.                                             | Development and industrialization of live attenuated<br>bovine rotaviruses and coronavirus multivalent vaccines<br>matched currently circulating viruses in South Korea | 37,576  | 112,727 | 10 April<br>2009  | 9 April 2012           |
| 39 | Wells Bio Co., Ltd.                                               | Development of a high sensitivity and high specificity<br>immunochromatographic test kit for rapid detection of<br>MERS CoV antigen                                     | 245,455 | 245,455 | 15 May 2019       | 14 May 2020            |

**Table S9.** Platform for detection and point-of-care diagnostics in Korea (Sub-cluster 1-3).

| NO | Organization                                       | Title                                                                                                                                      | Estimated Average Cost/Fiscal Year (USD) | Estimated Total Cost (USD) | Start date      | End date         |
|----|----------------------------------------------------|--------------------------------------------------------------------------------------------------------------------------------------------|------------------------------------------|----------------------------|-----------------|------------------|
| 1  | Kookmin University                                 | Severe Acute Respiratory Syndrome Coronavirus Heliase Reactor Study and Activity Inhibition RNA Aptamers                                   | 89,091                                   | 89,091                     | 1 November 2006 | 1 October 2007   |
| 2  | Kookmin University                                 | SiNW FET-based Bio-Molecular Multiplexed Diagnosis Systems                                                                                 | 60,982                                   | 182,945                    | 1 November 2013 | 31 October 2016  |
| 3  | Yonsei University                                  | Development of organic-inorganic hybrid 3D nanostructure                                                                                   | 3,385                                    | 416,364                    |                 | 31 August 2022   |
| 4  | Konkuk University                                  | Detection and control of airborne MERS virus bioaerosols via airborne fine biomaterial control technology                                  | 30,172                                   | 90,515                     | 1 November 2015 | 31 October 2018  |
| 5  | Sogang University                                  | Visualization of influenza virus using Qdot-aptamer beacon and 3D photonic crystals for enhancement of fluorescent signal                  | 45,455                                   | 45,455                     | 1 November 2016 | 31 October 2017  |
| 6  | Korea Advanced Institute of Science and Technology | Development of rapid immunoassay and monitoring systems for zoonosis                                                                       | 17,636                                   | 88,182                     | 16 August 2010  | 31 July 2015     |
| 7  | Seoul Asan Hospital                                | Advancement of Specimen Processing and Evaluation of Ultrasensitive Diagnostic Platform Technologies for Emerging Viruses                  | 30,636                                   | 153,182                    | 1 July 2016     | 31 March 2021    |
| 8  | Chonbuk National University                        | The development of prompt and customized genetic engineering technology-based approaches for the control of disastrous infectious diseases | 53,036                                   | 477,328                    | 1 June 2017     | 28 February 2026 |
| 9  | Konkuk University                                  | Development of platform technology for highly sensitive detection of emerging viruses using gene amplification and fluorescence monitoring | 48,182                                   | 240,909                    | 1 July 2016     | 31 March 2021    |
| 10 | Sungkyunkwan University                            | Biomimetic LSPR nanosensor for rapid diagnosis of lethal epidemic virus diseases                                                           | 11,364                                   | 34,091                     | 1 June 2018     | 31 May 2021      |
| 11 | Korea Institute of Science and Technology          | Highly multiplexed particle-qPCR for respiratory viral infection                                                                           | 90,909                                   | 454,545                    | 1 July 2016     | 31 March         |

|    |                                                          |                                                                                                                                                                                      |         |           |                  |                   |
|----|----------------------------------------------------------|--------------------------------------------------------------------------------------------------------------------------------------------------------------------------------------|---------|-----------|------------------|-------------------|
|    |                                                          |                                                                                                                                                                                      |         |           |                  | 2021              |
| 12 | Samsung Seoul Hospital                                   | Development of genetic-based point-of-care multiplexed diagnostic system                                                                                                             | 37,273  | 186,364   | 1 July 2016      | 31 March 2021     |
| 13 | Gwangju Institute of Science and Technology              | The development of monitoring system for detecting of transmitted disease in the inside environments                                                                                 | 90,909  | 90,909    | 27 March 2018    | 26 September 2018 |
| 14 | Kwangwoon University                                     | Ultrasensitive MERS-CoV Biosensor Composed of Multi-functional DNA 3 Way-Junction Probe based on Electrochemical-Surface Enhanced Raman Spectroscopy (EC-SERS) Dual Detection System | 15,152  | 45,455    | 1 June 2018      | 31 May 2021       |
| 15 | Korea Research Institute of Bioscience and Biotechnology | BT / IT / NT convergence technology for biorisk field diagnosis and monitoring                                                                                                       | 45,455  | 45,455    | 1 August 2008    | 31 December 2008  |
| 16 | Korea Research Institute of Bioscience and Biotechnology | Next-generation virus detection and control technology development                                                                                                                   | 17,455  | 87,273    | 1 January 2019   | 31 December 2023  |
| 17 | Geneclone Corporation                                    | Development of rapid diagnosis reagent and protein vaccine production technology for intermediate and intermediate respiratory syndrome (SARS)                                       | 79,091  | 79,091    | 1 April 2004     | 1 March 2005      |
| 18 | Genolution Inc.                                          | Developing Multi-plex and portable nucleic acid extraction instrument and reagents on-site emergency test of infectious diseases                                                     | 538,405 | 1,615,216 | 1 May 2016       | 31 December 2018  |
| 19 | Korea Electronics Technology Institute                   | Development of portable biosensing system for the detection of acute and infectious viral diseases                                                                                   | 623,727 | 2,494,909 | 1 December 2015  | 30 November 2019  |
| 20 | Biometrics Technology Co., Ltd.                          | Development and production of diagnostics for rapid diagnosis of respiratory diseases                                                                                                | 190,909 | 572,727   | 1 September 2014 | 31 August 2017    |

|    |                                    |                                                                                                                    |         |         |                  |                  |
|----|------------------------------------|--------------------------------------------------------------------------------------------------------------------|---------|---------|------------------|------------------|
| 21 | Center for Disease Control         | Development of Strategy for Control of Emerging and Re-Emerging Viruses                                            | 454,545 | 454,545 | 1 December 2004  | 1 December 2005  |
| 22 | Catholic University                | Development of diagnostic algorithm and evaluation of rapid isothermal amplification assay                         | 88,636  | 354,545 | 1 April 2016     | 31 December 2019 |
| 23 | Konkuk University                  | Development of rapid diagnosis technology for multiple influenza virus strains using isothermal gene amplification | 30,606  | 91,818  | 3 December 2015  | 30 November 2018 |
| 24 | Seoul Asan Hospital                | Diagnostic usefulness of newly developed diagnostic tests for emerging infectious diseases                         | 45,455  | 136,364 | 3 December 2015  | 30 November 2018 |
| 25 | Sogang University                  | Development of biosensor technology for detecting corona virus based on graphene oxide-gold nanoparticles          | 49,273  | 49,273  | 1 March 2017     | 31 December 2017 |
| 26 | Center for Disease Control         | Development of diagnostic resources for the rapid response of emerging respiratory viruses                         | 181,818 | 545,455 | 1 January 2016   | 31 December 2018 |
| 27 | Rapigen Inc.                       | Evaluation of MERS-CoV diagnosis kits for clinical application                                                     | 272,588 | 272,588 | 24 December 2015 | 23 October 2016  |
| 28 | Wonkwang University                | Evaluation of MERS-CoV diagnosis kits for clinical application                                                     | 263,636 | 263,636 | 24 December 2015 | 23 October 2016  |
| 29 | Seoul National University Hospital | Evaluation of MERS-CoV diagnosis kits for clinical application                                                     | 181,818 | 181,818 | 24 December      | 23 October 2016  |



|    |                            |                                                                                                                                                               |         |         |                   |                   |
|----|----------------------------|---------------------------------------------------------------------------------------------------------------------------------------------------------------|---------|---------|-------------------|-------------------|
|    |                            |                                                                                                                                                               |         |         | 2015              |                   |
| 30 | Kogene Co., Ltd.           | Evaluation of MERS-CoV diagnosis kits for clinical application                                                                                                | 170,909 | 170,909 | 29 December 2015  | 28 October 2016   |
| 31 | Center for Disease Control | Improvement of genetic diagnostic system and development of serological analysis for MERS-CoV detection                                                       | 51,515  | 154,545 | 1 July 2014       | 31 December 2016  |
| 32 | Center for Disease Control | A study on the construction of a dual antigen / antibody detection ELISA diagnostic system using SARS (severe acute respiratory syndrome) recombinant protein | 17,576  | 52,727  | 1 January 2005    | 31 December 2007  |
| 33 | Yonsei University          | Development of new technology for diagnosis of SARS virus using Aptamer                                                                                       | 125,455 | 125,455 | 18 September 2007 | 17 June 2008      |
| 34 | PCL Co., Ltd.              | Development of rapid diagnostic system for detection of Human coronaviruses based on POCT                                                                     | 90,909  | 90,909  | 7 July 2017       | 6 July 2018       |
| 35 | Flexense Co., Ltd.         | Development of nano-pattern plastic sensor based on surface plasmon for diagnosis of viral diseases                                                           | 195,602 | 391,205 | 14 December 2016  | 13 December 2018  |
| 36 | Paxgenbio Co., Ltd.        | Development of Universal Lateral flow assay system and STI10 kit                                                                                              | 181,818 | 181,818 | 20 November 2015  | 19 November 2016  |
| 37 | Paxgenbio Co., Ltd.        | Developed molecular diagnostic kit for influenza A, Influenza B, RSV field diagnosis based on isothermal amplification and lateral flow analysis technology   | 102,727 | 102,727 | 1 October 2019    | 30 September 2020 |
| 38 | Hanyang University         | Development of rapid molecular diagnosis kit for companion animals using real-time PCR method                                                                 | 79,871  | 79,871  | 1 May 2016        | 30 April 2017     |

|    |                                                                                                                                              |                                                                                                                                               |         |         |                  |                  |
|----|----------------------------------------------------------------------------------------------------------------------------------------------|-----------------------------------------------------------------------------------------------------------------------------------------------|---------|---------|------------------|------------------|
| 39 | JS Biotech                                                                                                                                   | Development of simultaneous detection technology of coronavirus using on-site diagnostic system                                               | 56,909  | 56,909  | 1 December 2016  | 30 November 2017 |
| 40 | Yonsei University                                                                                                                            | Development of Safety and Efficacy Evaluation Technology for MERS In Vitro Diagnostics                                                        | 138,273 | 138,273 | 1 June 2016      | 28 February 2017 |
| 41 | National Institute of Food and Drug Safety Evaluation                                                                                        | Research and development of guidelines for performance evaluation of diagnostic biosensor medical device appropriate for POCT environment (1) | 181,818 | 181,818 | 1 January 2016   | 31 December 2016 |
| 42 | Sungshin Women's University                                                                                                                  | Study on production of certified reference materials (CRM) for molecular diagnostic of infectious diseases (1)                                | 33,476  | 66,953  | 16 February 2016 | 30 November 2017 |
| 43 | Seoul National University                                                                                                                    | Development of diagnostic and evaluation techniques using n-protein of SARS (Severe acute respiratory syndrome virus)                         | 63,636  | 63,636  | 1 March 2006     | 1 November 2006  |
| 44 | Ministry of Agriculture, Food and Rural Affairs, Ministry of Agriculture, Food and Rural Affairs, Animal and Plant Hygiene Research Division | Establishment of genetic diagnostic method for the detection of Middle East Respiratory Syndrome virus                                        | 25,636  | 25,636  | 1 January 2014   | 31 December 2014 |
| 45 | Animal and Plant Quarantine Agency                                                                                                           | Domestic separation SARS corona, Rotavirus characterization and diagnosis method development                                                  | 236,364 | 472,727 | 1 January 2005   | 1 December 2006  |

**Table S10.** Structure-activity relationship modeling based virus prediction and activity modulation in Korea (Sub-cluster 2-1).

| NO | Organization                                             | Title                                                                                                                                                       | Estimated Average Cost/Fiscal Year (USD) | Estimated Total Cost (USD) | Start date       | End date         |
|----|----------------------------------------------------------|-------------------------------------------------------------------------------------------------------------------------------------------------------------|------------------------------------------|----------------------------|------------------|------------------|
| 1  | Yonsei University                                        | Basic research on new drug candidate discovery based on cheminformatics                                                                                     | 296,970                                  | 890,909                    | 1 September 2006 | 31 August 2009   |
| 2  | Korea Research Institute of Bioscience and Biotechnology | Development of viral recombination prediction and validation technique using bioinformatics                                                                 | 30,303                                   | 272,727                    | 1 January 2014   | 31 August 2022   |
| 3  | Kingdom University                                       | Big-data analysis on viral infection using epigenetic information                                                                                           | 48,158                                   | 144,475                    | 1 June 2016      | 31 May 2019      |
| 4  | Seoul National University                                | Simulation study for the prediction of zoonotic infection risk using genetic variation markers of viruses                                                   | 26,515                                   | 79,545                     | 1 June 2017      | 31 May 2020      |
| 5  | Korea University                                         | Development of universal countermeasures against viral diseases based on X-ray free electron laser technology                                               | 140,151                                  | 560,605                    | 1 December 2016  | 30 November 2020 |
| 6  | Seoul National University                                | Research on genetic variations associated with local adaptation of indigenous African cattle via modeling large-scale SNP sequence data using deep learning | 31,818                                   | 63,636                     | 1 November 2016  | 31 October 2018  |
| 7  | Center for Disease Control                               | Variation predict and viral attenuation of MERS-CoV                                                                                                         | 254,545                                  | 763,636                    | 1 January 2016   | 31 December 2018 |

**Table S11.** Studies on design of antiviral agents based on the structure and function of viral and human receptor proteins in Korea (Sub-cluster 2-2).

| NO | Organization                    | Title                                                                                                                                    | Estimated Average Cost/Fiscal Year (USD) | Estimated Total Cost (USD) | Start date       | End date         |
|----|---------------------------------|------------------------------------------------------------------------------------------------------------------------------------------|------------------------------------------|----------------------------|------------------|------------------|
| 1  | Sungkyunkwan University         | Discovering ligands that bind to RNA-like knot structures through computerized compound group searches and biochemical activity analysis | 22,727                                   | 45,455                     | 1 September 2003 | 1 August 2005    |
| 2  | Sungkyunkwan University         | RNA Pseudoknot Targeted Virtual Screening: Discovery of Novel Ligands that Regulate -1 Ribosomal Frameshifting                           | 6,364                                    | 6,364                      | 1 November 2005  | 1 October 2006   |
| 3  | Sungkyunkwan University         | Development of Candidate Anti-frameshift Drugs against SARS Coronavirus through Lead Optimization                                        | 104,545                                  | 104,545                    | 1 July 2008      | 30 June 2009     |
| 4  | Pusan National University       | Studies on development of novel antiviral agent based on mechanism of target enzyme, S-adenosylhomocysteine hydrolase (SAH)              | 22,727                                   | 45,455                     | 1 May 2005       | 1 March 2007     |
| 5  | Institut Pasteur Korea          | Preparedness to Emerging Viruses                                                                                                         | 500,035                                  | 3,000,210                  | 30 June 2017     | 31 December 2022 |
| 6  | Ilyang Pharmaceutical Co., Ltd. | Deriving new candidates for development of therapeutics in the Middle East Respiratory Syndrome                                          | 152,727                                  | 763,636                    | 1 July 2016      | 31 March 2021    |
| 7  | Ulsan University                | Safe and high-throughput pseudo virus-based screening of natural compounds to inhibit emerging viruses                                   | 26,617                                   | 79,852                     | 1 June 2017      | 31 May 2020      |
| 8  | Ewha Women University           | Development of antiviral agents targeting active sites of MERS-CoV proteases                                                             | 22,815                                   | 45,630                     | 1 November 2016  | 31 October 2018  |
| 9  | Hallym University               | Development of therapeutic target and candidate for immunotherapy against middle east respiratory syndrome coronavirus (MERS-CoV)        | 83,636                                   | 418,182                    | 1 July 2016      | 31 March 2021    |
| 10 | Konkuk University               | Structural Study of SARS Helicase and its Complex with RNA Aptamers                                                                      | 14,300                                   | 42,900                     | 1 May 2009       | 30 April 2012    |
| 11 | Sungkyunkwan University         | Development of antiviral drugs that control new infectious                                                                               | 20,909                                   | 20,909                     | 1 November       | 31 October       |

| diseases through leading material optimization research |                                                          |                                                                                                                                        |         |           | 2009            | 2010             |
|---------------------------------------------------------|----------------------------------------------------------|----------------------------------------------------------------------------------------------------------------------------------------|---------|-----------|-----------------|------------------|
| 12                                                      | Korea Advanced Institute of Science and Technology       | Development of novel therapeutics for infectious diseases through activation of innate immune system                                   | 178,182 | 356,364   | 1 November 2015 | 31 October 2017  |
| 13                                                      | Korea Research Institute of Bioscience and Biotechnology | Development of biomaterial for virus infection control                                                                                 | 287,091 | 1,435,455 | 1 May 2009      | 31 March 2014    |
| 14                                                      | Korea Research Institute of Bioscience and Biotechnology | Optimization and action mechanism study of biomaterial (JSC, KW-200) for virus infection control                                       | 103,636 | 518,182   | 1 May 2009      | 31 March 2014    |
| 15                                                      | Korea Research Institute of Bioscience and Biotechnology | Development of eco-friendly active biomaterials for preventing and treating infection inflammation                                     | 222,197 | 2,666,364 | 1 January 2009  | 31 December 2020 |
| 16                                                      | Korea Research Institute of Bioscience and Biotechnology | Development of candidates for treatment for infectious viral infections                                                                | 45,455  | 45,455    | 1 January 2008  | 31 December 2008 |
| 17                                                      | Jeollabuk-do Biological Industry Promotion Agency        | Antiviral and anti-harmful microorganism preparations using natural plant extracts                                                     | 7,891   | 7,891     | 1 March 2012    | 28 February 2013 |
| 18                                                      | Chungnam National University                             | Development of feline infectious peritonitis antiviral agent                                                                           | 108,943 | 108,943   | 1 June 2014     | 31 May 2015      |
| 19                                                      | Immunemed Co., Ltd.                                      | Identification of new cytokine VSF function and production of recombinant VSF secretion strain                                         | 80,909  | 80,909    | 1 December 2005 | 1 November 2006  |
| 20                                                      | Wonkwang University                                      | Common infectious disease treatment research and development project                                                                   | 236,364 | 1,181,818 | 1 May 2005      | 1 April 2010     |
| 21                                                      | Chonbuk National University                              | Development of recombinant subunit vaccine candidates for the protection against MERS-CoV infection                                    | 68,182  | 272,727   | 3 December 2015 | 30 November 2019 |
| 22                                                      | Korea Advanced Institute of Science and Technology       | Protein engineering-based MERS virus infection suppression protein development and MERS virus surface protein structure identification | 9,091   | 9,091     | 1 April 2017    | 31 December      |

|    |                                                                    |                                                                                                                                                               |         |         |                        | 2017                   |
|----|--------------------------------------------------------------------|---------------------------------------------------------------------------------------------------------------------------------------------------------------|---------|---------|------------------------|------------------------|
| 23 | Gueulri Co., Ltd.                                                  | Development of natural product-derived agents for the prevention and response to virus infection in animals                                                   | 157,091 | 157,091 | 1 July 2013            | 30 June 2014           |
| 24 | Gachon University<br>Industry-University<br>Cooperation Foundation | Development and industrialization of treatment materials for chronically infected Hefei virus using domestic plant resources                                  | 34,545  | 172,727 | 26<br>December<br>2011 | 25<br>December<br>2016 |
| 25 | Immunemed Co., Ltd.                                                | Research on the development of therapeutic agents for viral diseases through the discovery of new antiviral substances and production of recombinant proteins | 30,000  | 90,000  | 1 May 2006             | 30 April<br>2009       |

**Table S12.** Infectious Disease Epidemiological Investigation & Animal and Environmental Ecology in Korea (Cluster 3).

| NO | Organization                       | Title                                                                                                                        | Estimated Average Cost/Fiscal Year (USD) | Estimated Total Cost (USD) | Start date       | End date         |
|----|------------------------------------|------------------------------------------------------------------------------------------------------------------------------|------------------------------------------|----------------------------|------------------|------------------|
| 1  | Seoul National University          | Research on basic technology for prevention of common infectious diseases                                                    | 301,515                                  | 904,545                    | 1 September 2006 | 1 August 2009    |
| 2  | Korea University                   | IoT Based Realtime Tracking and Management of Infectious Diseases in Hospital                                                | 90,895                                   | 90,895                     | 1 December 2015  | 30 November 2016 |
| 3  | Seoul City University              | Studies on the Development of MERS Diffusion Route Detection and Prevention Technology: focus on public transportation users | 45,455                                   | 227,273                    | 29 November 2019 | 28 November 2024 |
| 4  | Inha University                    | Mathematical Control Strategies for Effective Preventive Measures Against Epidemics: Macroscopic and Microscopic Viewpoints  | 26,515                                   | 79,545                     | 1 June 2017      | 31 May 2020      |
| 5  | Konkuk University                  | Mathematical models of contact management and spread of infectious diseases                                                  | 90,909                                   | 181,818                    | 7 November 2018  | 31 December 2019 |
| 6  | Seoul National University Hospital | Research on the pursuit of immunocompromised MERS                                                                            | 363,636                                  | 363,636                    | 24 December 2015 | 23 October 2016  |
| 7  | National Medical Center            | Clinical and immunological study of 3 years after infection in MERS patients                                                 | 227,271                                  | 227,271                    | 8 December 2017  | 7 December 2018  |
| 8  | National Medical Center            | Clinical and immunological study of 4 years after infection in MERS patients                                                 | 181,816                                  | 181,816                    | 1 February 2019  | 31 December 2019 |

|    |                                                             |                                                                                                                                                 |        |         |                |                  |
|----|-------------------------------------------------------------|-------------------------------------------------------------------------------------------------------------------------------------------------|--------|---------|----------------|------------------|
| 9  | Woori Airtech Korea Co., Ltd.                               | Developed mobile sound pressure booths to prevent secondary infections and medical staff when treating various infectious diseases such as MERS | 58,237 | 58,237  | 1 June 2016    | 28 February 2017 |
| 10 | National Institute of Animal Science                        | Analysis and monitoring of clinical and epidemiological features of African Swine Fever                                                         | 45,455 | 90,909  | 1 March 2020   | 31 December 2021 |
| 11 | Agriculture, Forestry and Livestock Quarantine Headquarters | Studies on surveillance for porcine delta coronavirus in Korea and its pathogenicity                                                            | 39,455 | 78,909  | 1 January 2016 | 31 December 2017 |
| 12 | Agriculture, Forestry and Livestock Quarantine Headquarters | Monitoring and biological characteristics of canine parvovirus2 and feline coronavirus in Korea                                                 | 34,802 | 104,405 | 1 January 2019 | 31 December 2021 |
